# Supplementary material for: Elevated expression of MMP-2 and TIMP-2 cooperatively correlates with risk of lung cancer
Source: PubMed Central journal article supplement (PMC5655220; doi:10.18632/oncotarget.20156), 2017-08-11
Supplement: oncotarget-08-80560-s001.pdf [file oncotarget-08-80560-s001.pdf]

## Elevated expression of MMP-2 and TIMP-2 cooperatively correlates with risk of lung cancer

### SUPPLEMENTARY MATERIALS

**Supplementary Table 1: Clinical characteristics of patients in the validation cohort**

|                              | Lung cancer ( <i>n</i> = 41) | Benign diseases ( <i>n</i> = 66) | <i>P</i> value |
|------------------------------|------------------------------|----------------------------------|----------------|
| Age, years                   |                              |                                  | 0.488          |
| Mean ± SEM                   | 60.2 ± 1.5                   | 58.4 ± 1.3                       |                |
| Gender, <i>n</i> (%)         |                              |                                  | 0.122          |
| Male                         | 33 (80.5%)                   | 44 (66.7%)                       |                |
| Female                       | 8 (19.5%)                    | 22 (33.3%)                       |                |
| Smoking status, <i>n</i> (%) |                              |                                  | 0.191          |
| Smokers                      | 27 (65.9%)                   | 35 (53.0%)                       |                |
| Non-smokers                  | 14 (34.1%)                   | 31 (47.0%)                       |                |
| Cell type, <i>n</i> (%)      |                              |                                  |                |
| Squamous cell carcinoma      | 19 (46.3%)                   |                                  |                |
| Adenocarcinoma               | 14 (34.1%)                   |                                  |                |
| Small-cell lung cancer       | 8 (19.5%)                    |                                  |                |

**Supplementary Table 2: Diagnostic accuracy of MMP-2 and TIMP-2 in the validation cohort**

|                           | MMP-2 | TIMP-2 |
|---------------------------|-------|--------|
| True positive             | 33    | 29     |
| False positive            | 17    | 29     |
| True negative             | 49    | 37     |
| False negative            | 8     | 12     |
| Sensitivity               | 80.5% | 70.7%  |
| Specificity               | 74.2% | 56.1%  |
| Positive predictive value | 66.0% | 50.0%  |
| Negative predictive value | 86.0% | 75.5%  |
